# Supplementary material for: Meta-population structure in a coral reef fish demonstrated by genetic data on patterns of migration, extinction and re-colonisation
Source: PubMed Central journal article supplement (PMC2553088; doi:10.1186/1471-2148-8-248), 2008-09-12

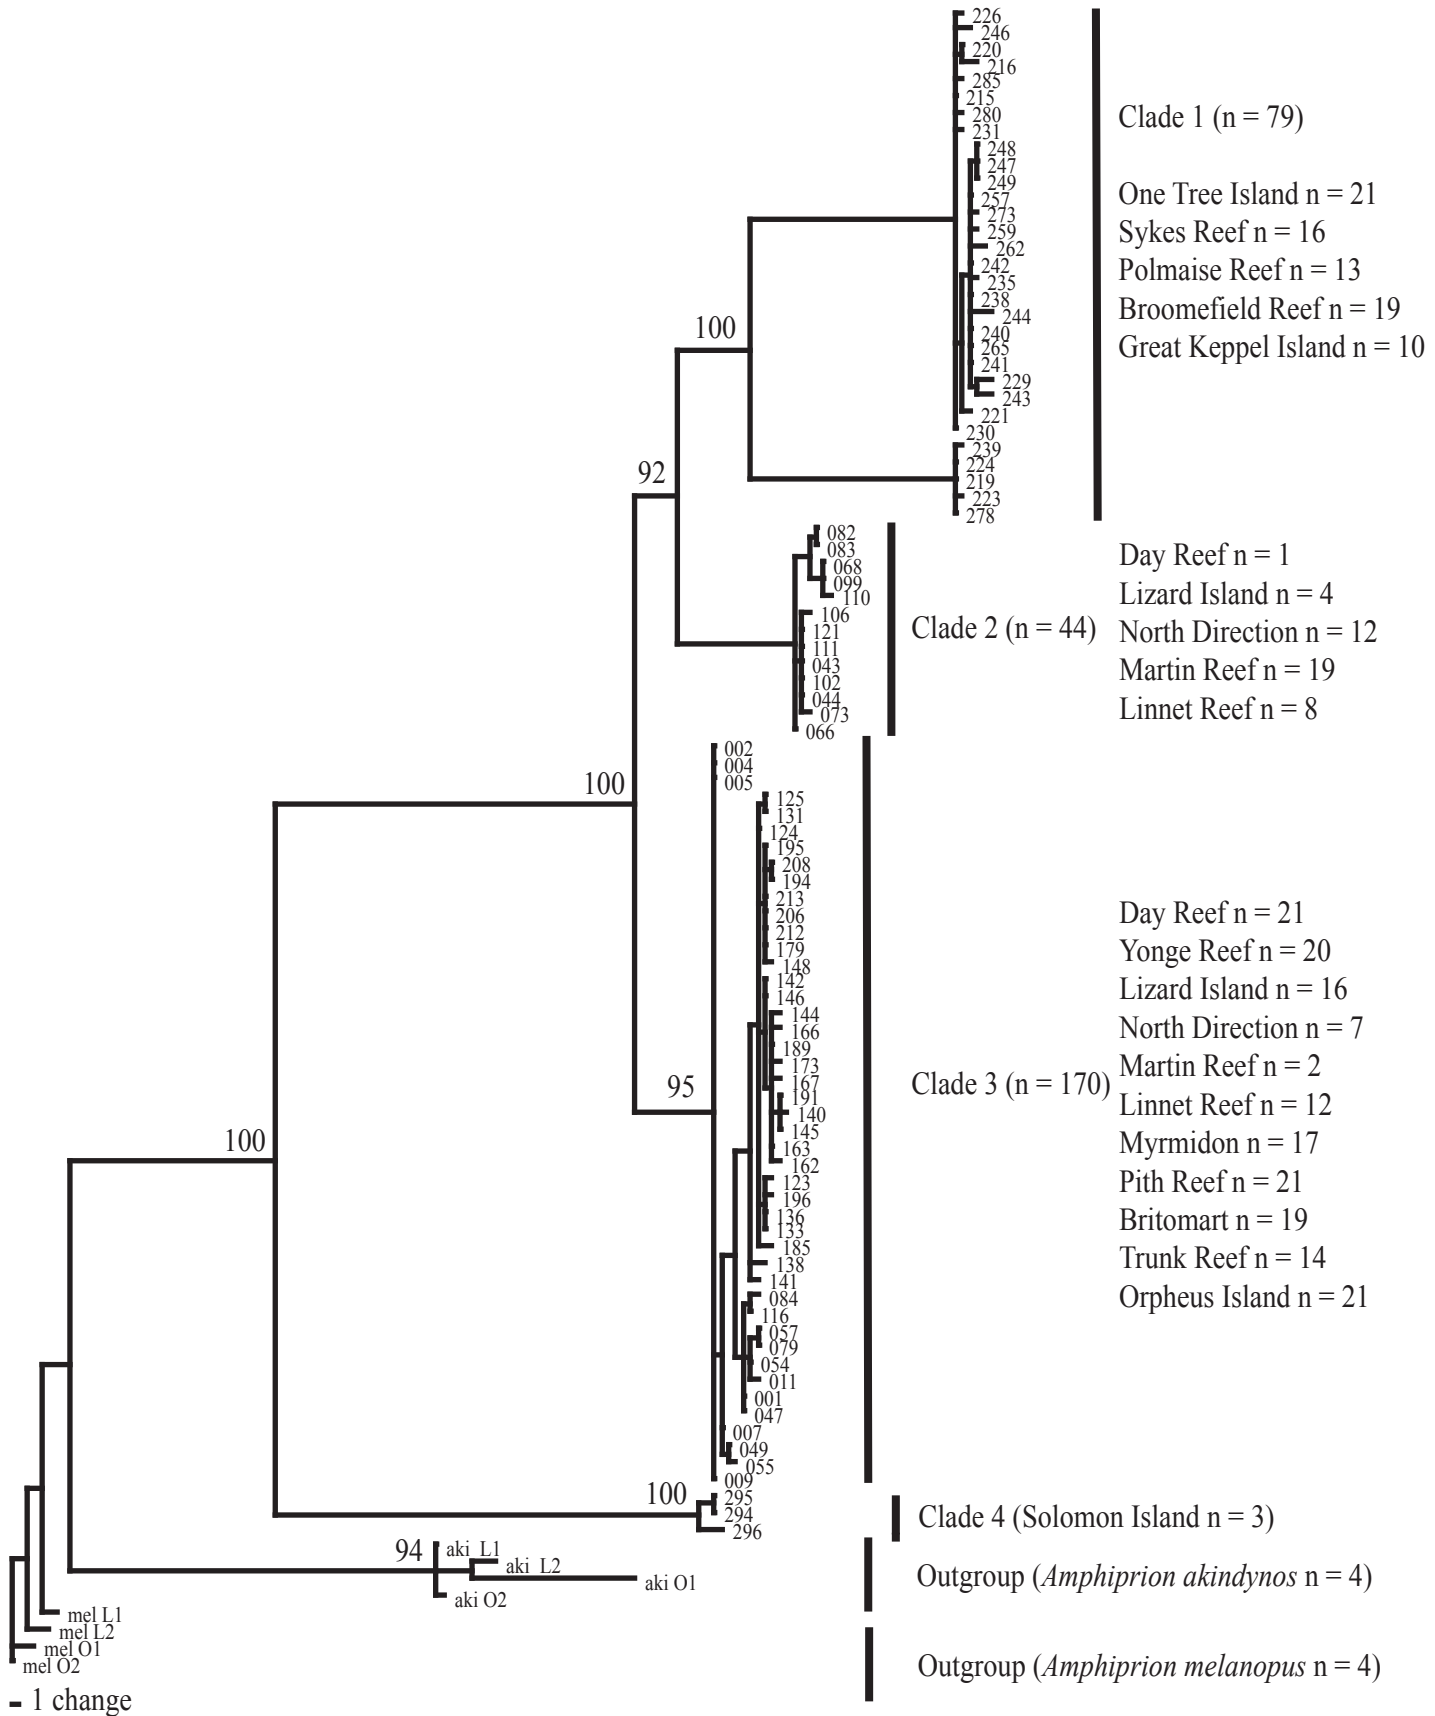

Supplement: 1471-2148-8-248-S2.pdf [file 1471-2148-8-248-S2.pdf]
